# Supplementary material for: Long-term outcomes of out-of-center veno-arterial ECMO cannulation for cardiopulmonary failure: investigation of prognostic parameters for a decision support tool – a 16-year retrospective study
Source: Springer Nature journal article supplement (doi:10.1186/s13049-025-01401-7), 2025-05-12
Supplement: MOESM1 [file 13049_2025_1401_MOESM1_ESM.pdf]

# Abfragebogen für Patienten mit ECMO unterstütztem Intensivtransport

Internistische Int. St. 93: Tel 0941- 944 1 7350 Fax 944 7365

Herzchirurgie St. 97: Tel 0941-944 9834 Fax 944 9832 | Anästhesiologische Int. St. 90: 0941- 944 7920 Fax 944 7924

| Externe Klinikdaten |                | Patientendaten |
|---------------------|----------------|----------------|
| Datum:              | Uhrzeit:       | Patientenname: |
| Klinik:             | Geburtsdatum:  |                |
| Station:            | Größe:         | Gewicht:       |
| Anrufer:            | Aufnahmedatum: |                |
| Rückrufnummer:      |                |                |

| Anamnese      |                                                                                |                          |
|---------------|--------------------------------------------------------------------------------|--------------------------|
|               |                                                                                |                          |
| Keimnachweis: | Abstriche:                                                                     | Multiresistente Erreger: |
| Antibiosen:   | Isolationspflichtig: <input type="checkbox"/> ja <input type="checkbox"/> nein |                          |
| Neurologie:   | CT vorhanden: <input type="checkbox"/> ja <input type="checkbox"/> nein        |                          |

| Respiration        |      | Hämodynamik          |  |
|--------------------|------|----------------------|--|
| Beatmungsbeginn:   |      | Noradrenalin (mg/h): |  |
| FiO <sub>2</sub> : | pH:  | Adrenalin (mg/h):    |  |
| AMV:               | TV:  | Blutdruck:           |  |
| PEEP:              | PIP: | ZVD:                 |  |

| Labor      |               |         |                                                                  |
|------------|---------------|---------|------------------------------------------------------------------|
| Kreatinin: | Bilirubin:    | Laktat: | CVVHF: <input type="checkbox"/> ja <input type="checkbox"/> nein |
| GOT:       | Hb:           |         | CT-Thorax:                                                       |
| PTT:       | Leukozyten:   |         | ECHO/TEE:                                                        |
| INR:       | Thrombozyten: |         | IABP:                                                            |

| Zugänge                   |      |
|---------------------------|------|
| ZVK:                      | Ort: |
| Arterie:                  | Ort: |
| Gefäßprothesen in Leiste: |      |
| Thoraxdrainagen:          |      |

| Informationen an (Funk 1485) |                                  |
|------------------------------|----------------------------------|
| Kardiotechniker:             | HTC OA:(Bei kardialem Versagen): |

|                             |                                                                          |
|-----------------------------|--------------------------------------------------------------------------|
| Transport mit ECMO          | <input type="checkbox"/> ja <input type="checkbox"/> nein                |
| Organversagen primär:       | <input type="checkbox"/> kardial <input type="checkbox"/> respiratorisch |
| Aufnehmende Station im UKR: |                                                                          |
| Übernahme zugesagt:         | <input type="checkbox"/> ja <input type="checkbox"/> nein                |
| Uhrzeit:                    |                                                                          |
| Bearbeiter:                 |                                                                          |
